# Supplementary material
Source: publisher site journal article supplement (https://www.dovepress.com/article/462917)
Supplement: Supplementary file 1 [file get_supplementary_file.php]

**Supplementary Information**


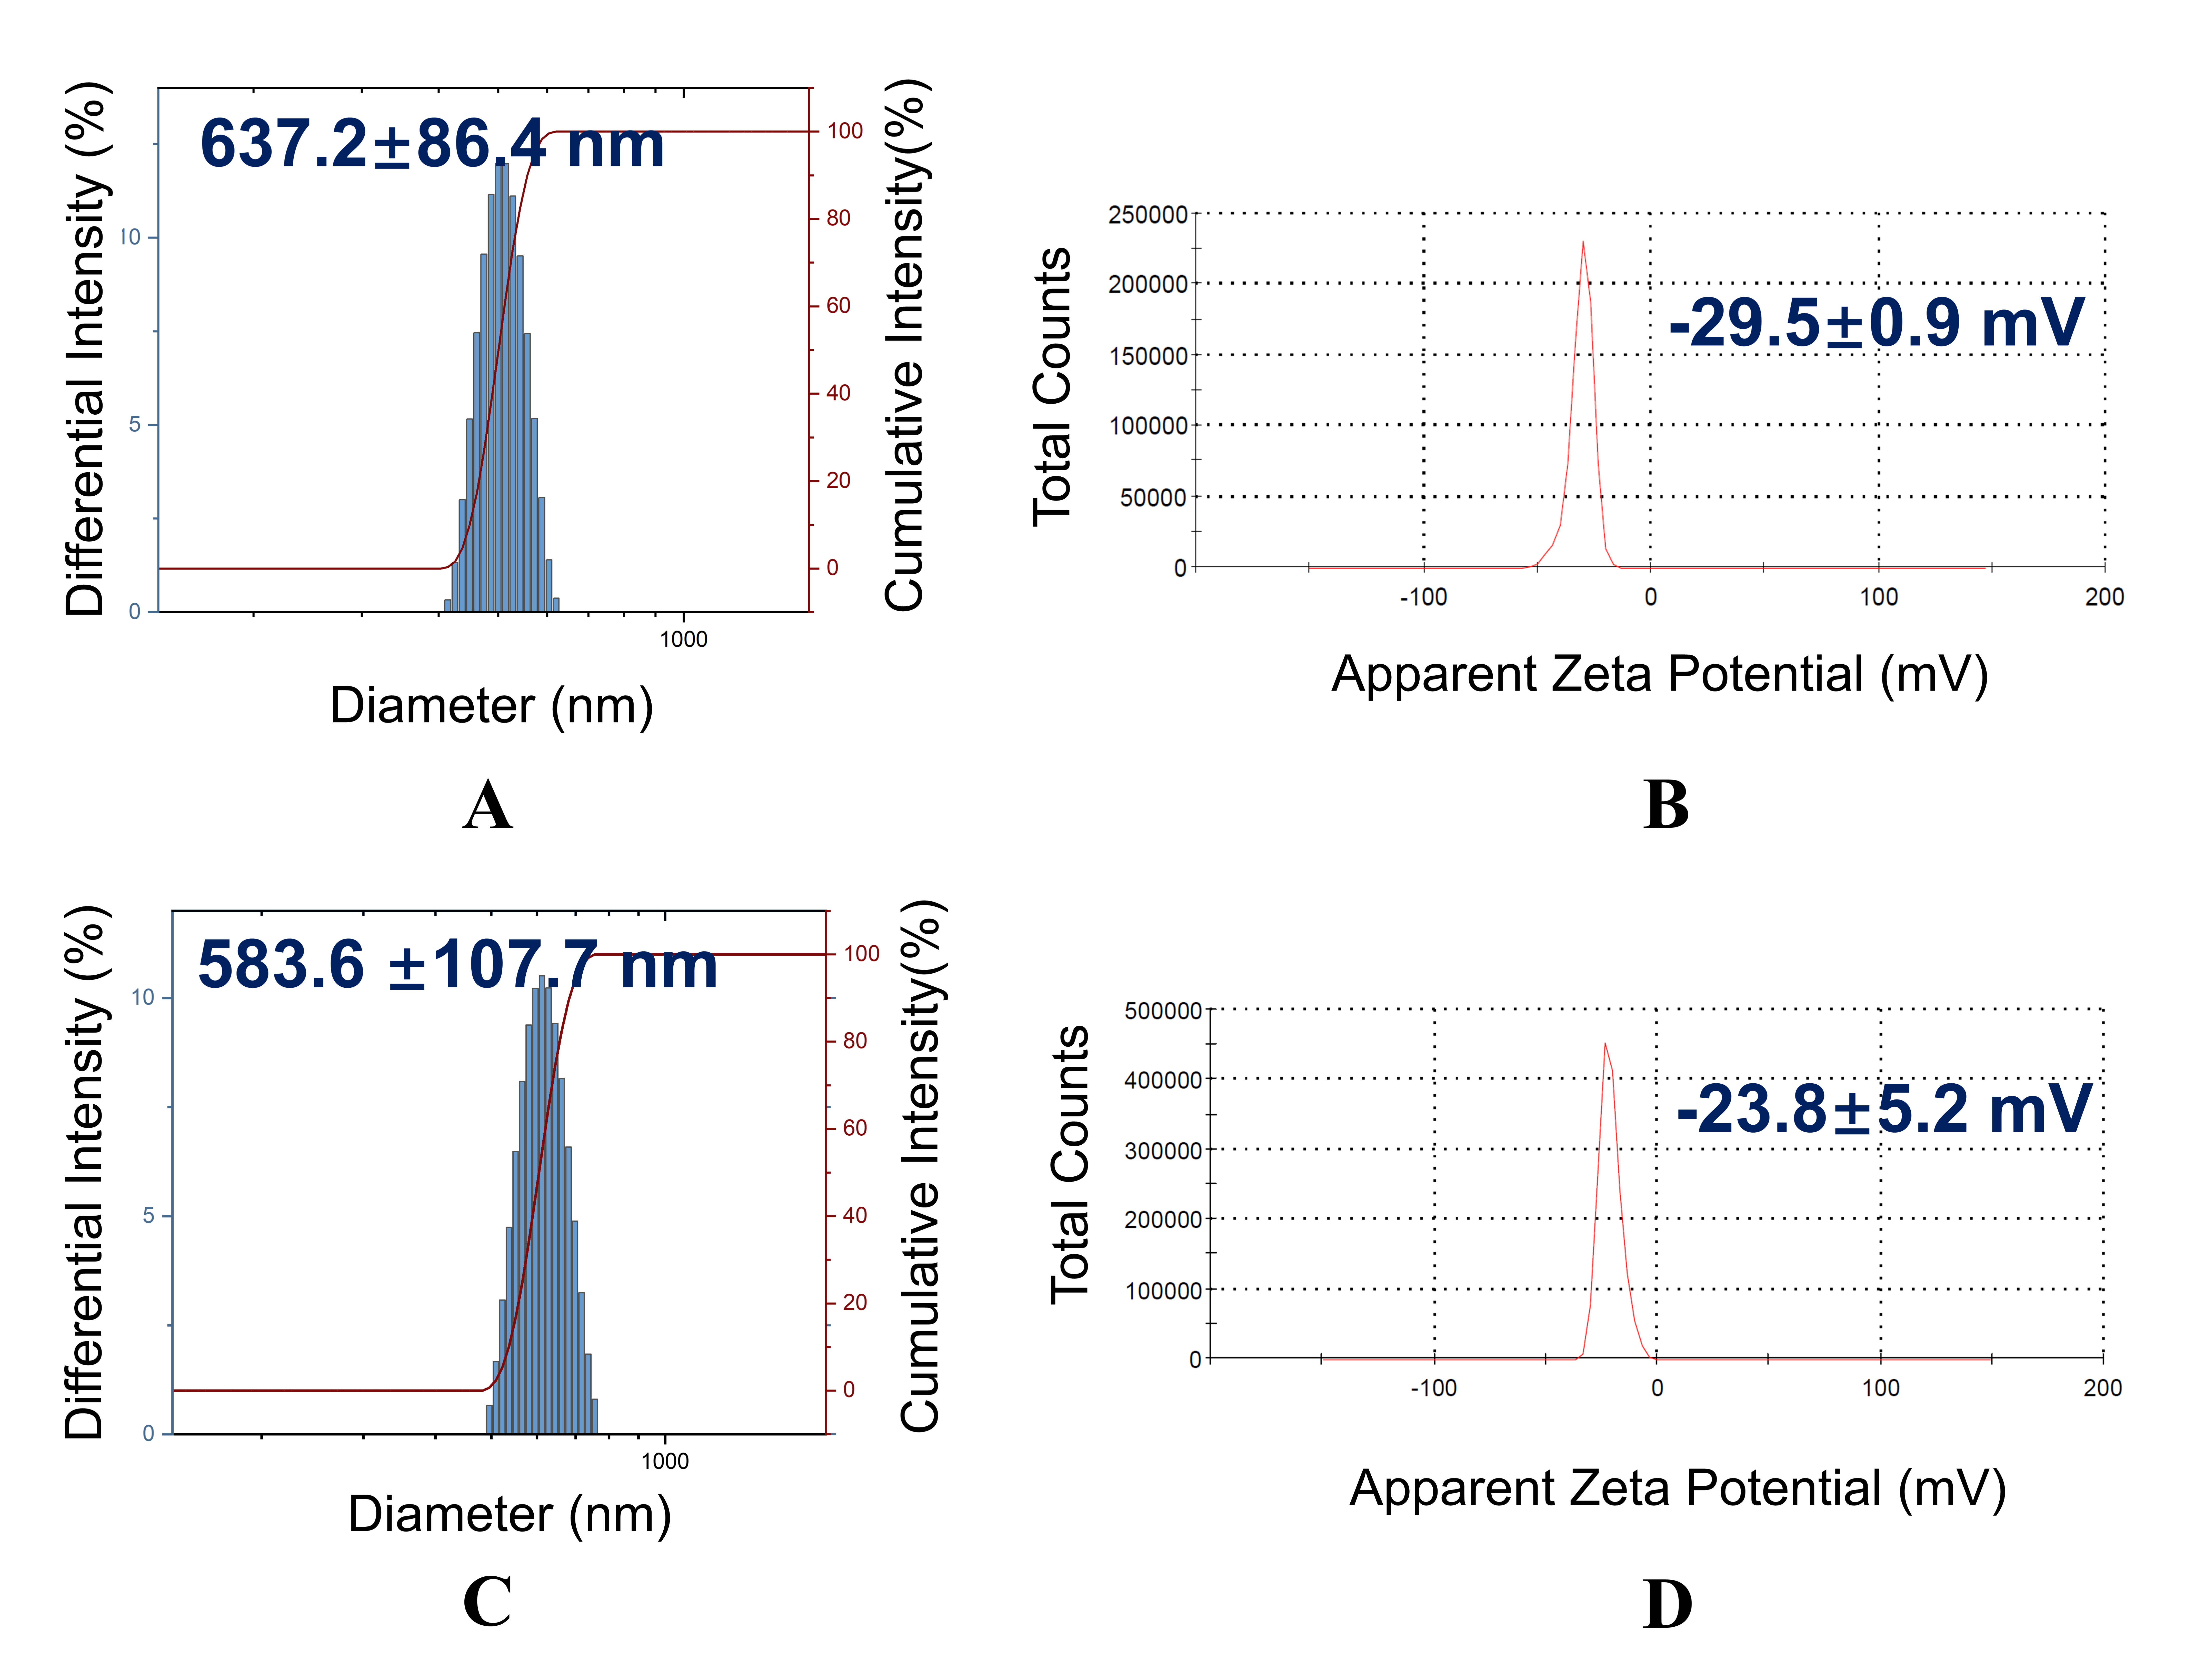


**Figure S1.** Characteristics of IR783-SiO2NPs@NB and IR783-NB. Size distribution (A) and zeta potential (B) of IR783-SiO2NPs@NB. Size distribution (C) and zeta potential (D) of IR783-NB.


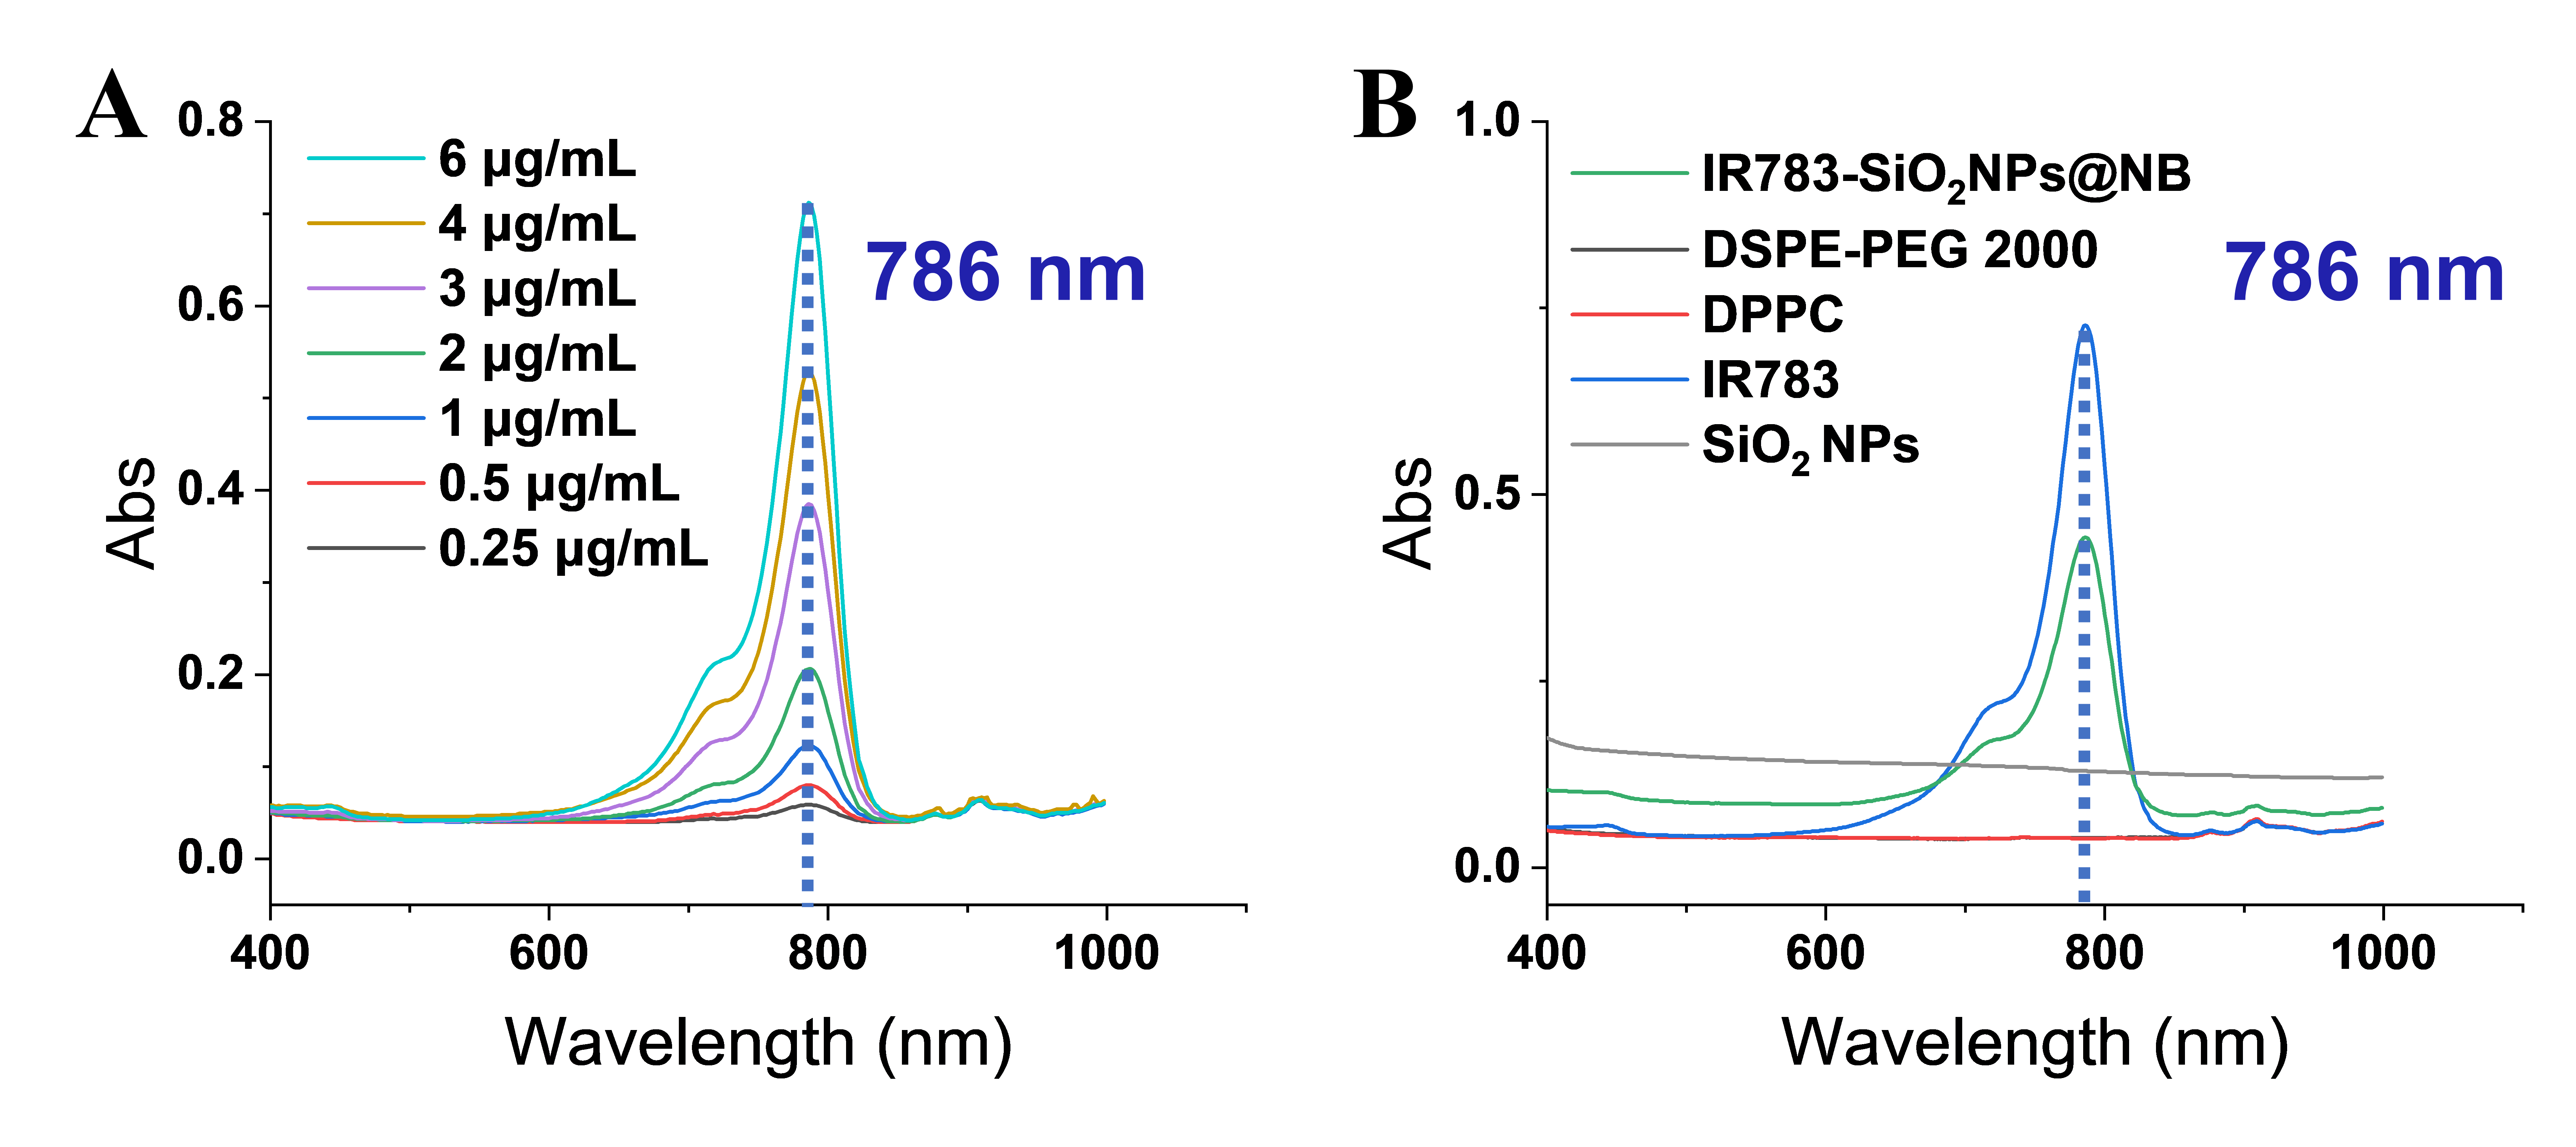


**Figure S2.** (A) The absorbance spectra of IR783 in ethanol solution at various concentrations. (B) The absorption spectra of IR783, DPPC, DSPE-PEG 2000, SiO2NPs, and IR783-SiO2NPs@NB in ethanol solution.


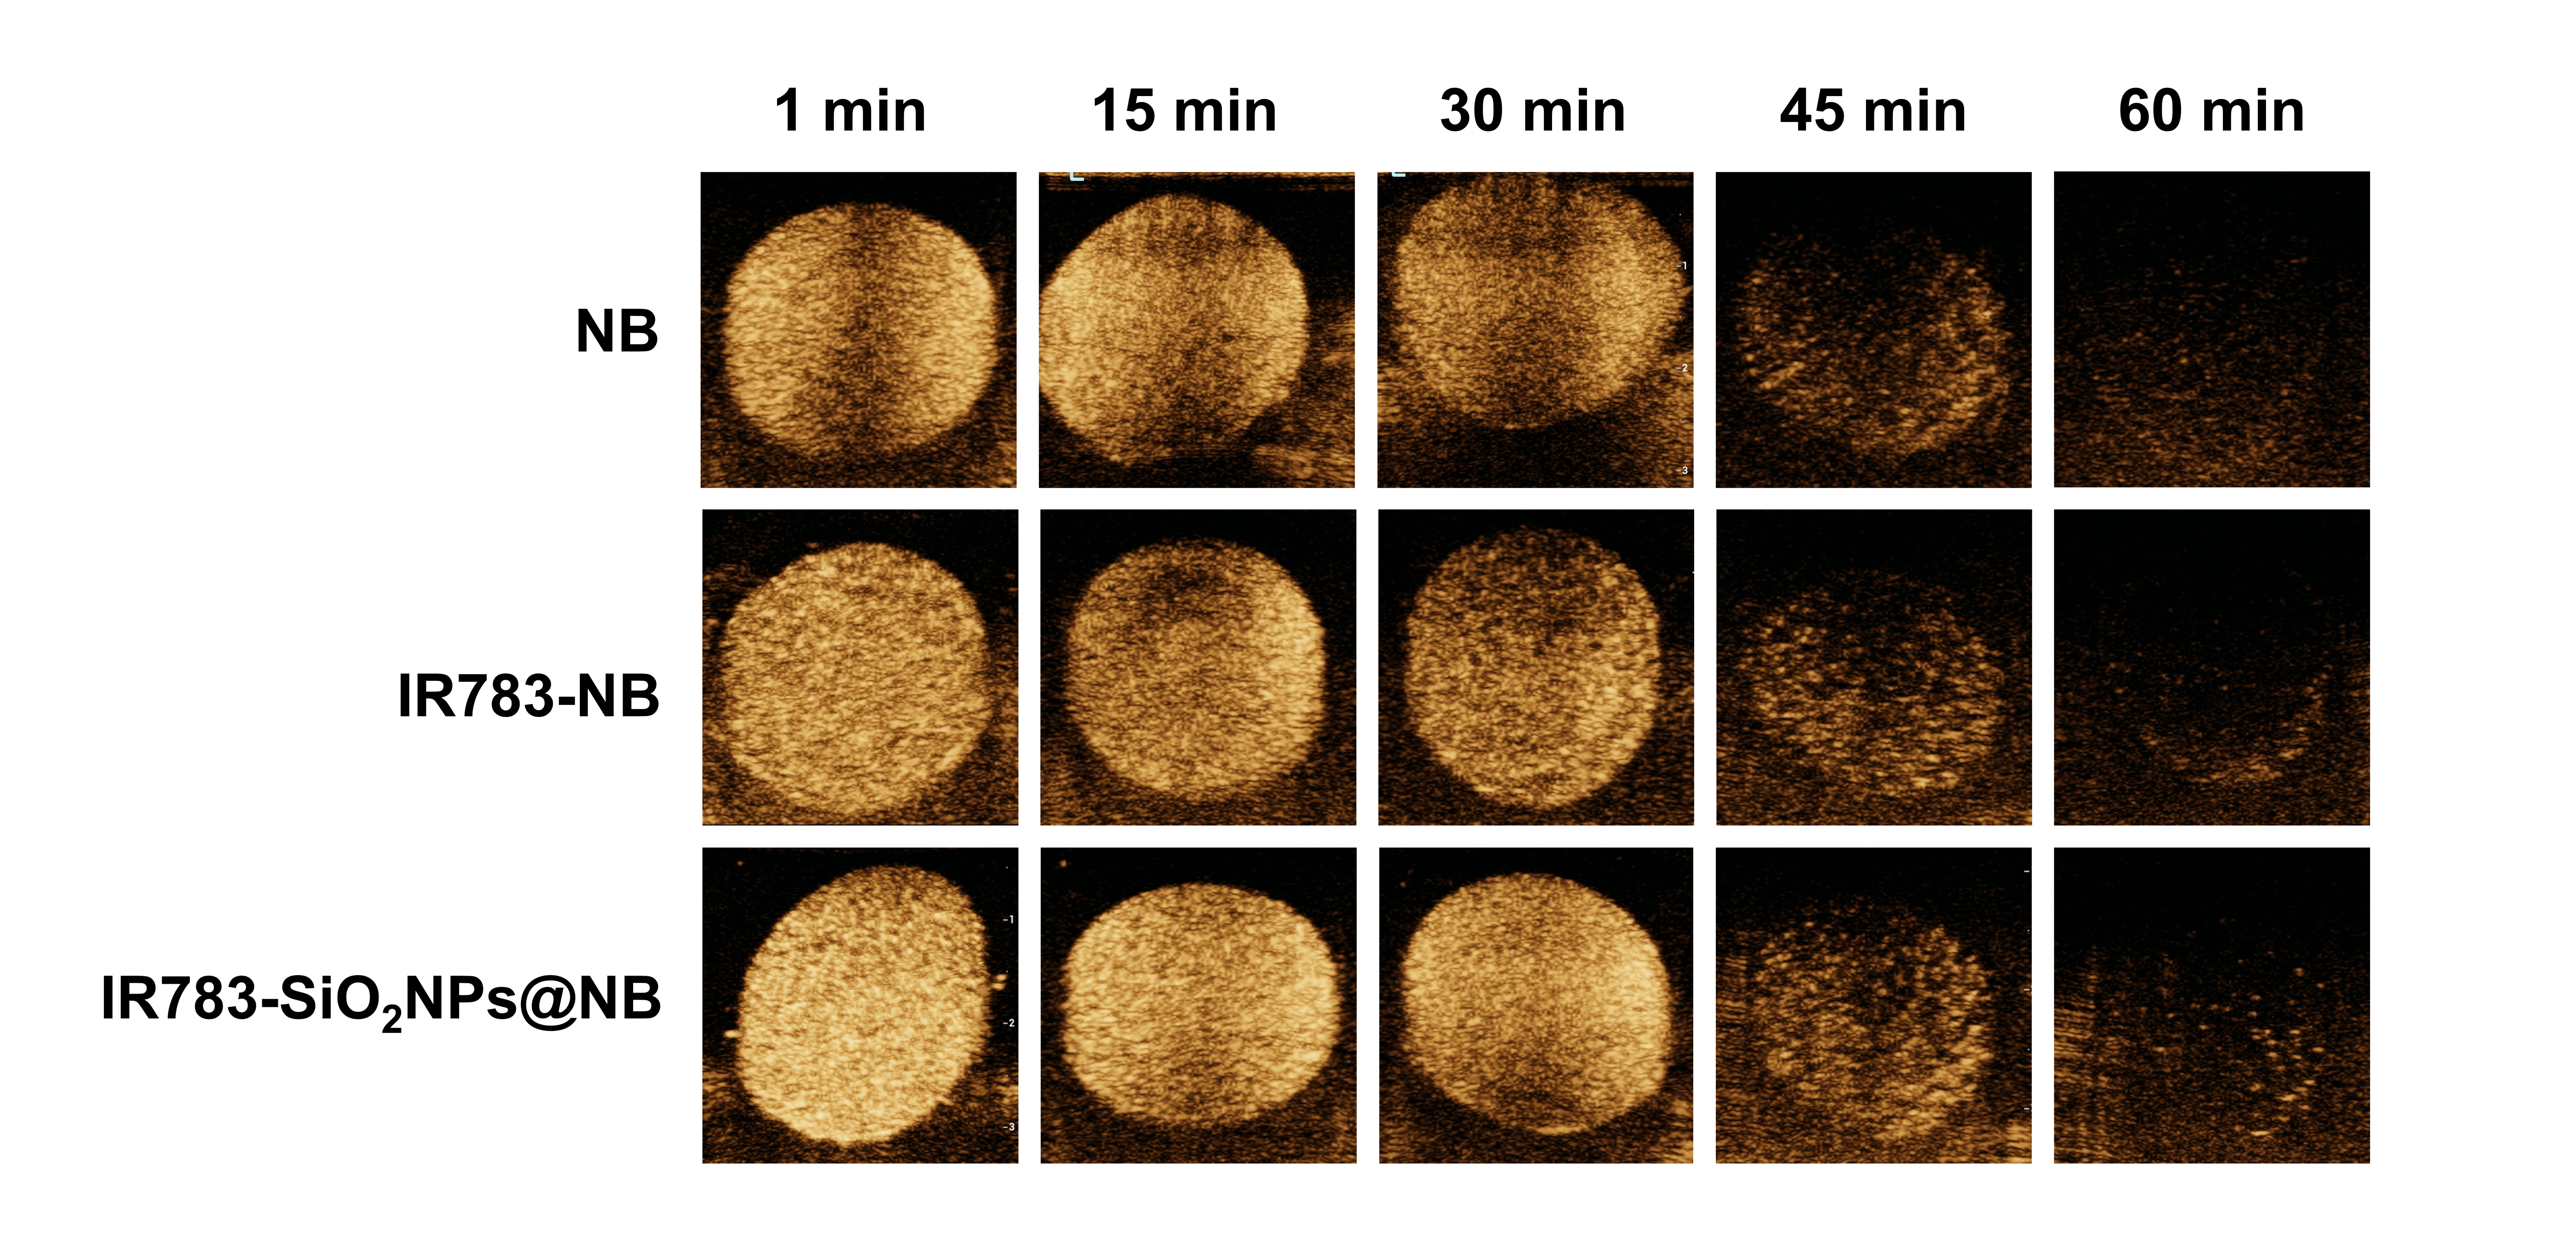


**Figure S3.** The in vitro echogenicity changes of NB, IR783-NB and IR783-SiO2NPs@NB over time.
